# Supplementary material for: Stylistic variation on the Donald Trump Twitter account: A linguistic analysis of tweets posted between 2009 and 2018
Source: PLOS journal article supplement (doi:10.1371/journal.pone.0222062), 2019-09-25
Supplement: S2 (10.1371/journal.pone.0222062.s002) [file journal.pone.0222062.s002]

## Trump Feature Set

### TAG

AMPLIFIER

ANALNEG

ATTRIBADJ

PROCONTRACT

AUXDO

BRACKET

CAPS

COLON

COMMA

CNTRSTCONJ

CCONJ

BEMV

DEFART

EXCLAM

FSTPP

OTHERADV

OTHRINTJ

## Features in > 5% Tweets

### Feature

Amplifier

Analytic-Neg

Attributive-  
Adjective

Auxiliary

Contraction

Auxiliary-Do

Bracket

Capital

Colon

Comma

Contrastive

Conj.

Coordinating

conj.

Copula BE

Definite Article

Exclamation

Mark

First Pers. Pron.

General Adverb

General

### Description

Refers to adverbs used to intensify the verb/adjective

Refers to 'not' plus contracted forms

Adjectives that come before the noun and any other adjective not tagged as predicative

Refers to when the verb is contracted with pronoun

Refers to any form of DO that is followed by (up to three adverbs and) a verb

Refers to the use of brackets

Refers to two or more capital letters that is not tagged as an acronym/URL/mentioned username

Refers to the use of colons

Refers to the use of commas

Refers to conjunctions that signal a contrast is being made

Refers to coordinating conjunctions

Refers to when BE is the main verb and when BE is in its copular form; that is, when it is followed by a predicative adjective

Refers to the use of the definite article

Refers to the use of exclamation marks

Refers to pronouns: subject/object/possessive/reflexive and possessive determiners that refer to the first person: singular and plural plus contracted forms

Refers to other adverbs that are not tagged as amplifiers, downtoners, time and place adverbials, etc.

Refers to other interjections that are not tagged as laughter, positive

### Example

very, absolutely, so

can't, cannot, not

The *big* cat

I'm, She'd, They've, You'll,

That's

I *do* not like cheese, I *did* take the bins out

:

,

but, by contrast

and, &

She *is* a beautiful woman; She *is* beautiful

!!!, !?

I, We, us, me, myself, ourselves, ours, our, my, mine

OMG, WOW!

|                  |                      |                                                                                                                                                                                                                                                                                                       |                                                             |
|------------------|----------------------|-------------------------------------------------------------------------------------------------------------------------------------------------------------------------------------------------------------------------------------------------------------------------------------------------------|-------------------------------------------------------------|
|                  | Interjections        | interjection 'Yes', negative interjections 'No'                                                                                                                                                                                                                                                       |                                                             |
| OTHRNOUN         | General Noun         | Refers to other nouns that are not tagged as numeral, quantifiers, nominalisations, ordinals                                                                                                                                                                                                          |                                                             |
|                  |                      | Refers to other verbs that are not tagged as private verbs, public verbs, verb-ing, past tense verbs, participle verbs, third person singular, suasive verbs, perception verbs, copular verbs, be as main verb, auxiliary be, auxiliary have, be as main verb, pro-verb do, auxiliary do, stance verb |                                                             |
| OTHRVERB         | General Verb         | Refers to prepositional complement: when a preposition is followed by noun in -ing form (but this is tagged by Gimpel tagger as a verb)                                                                                                                                                               | Sarah talked about <i>leaving</i> her job                   |
| GERUND           | Gerund               |                                                                                                                                                                                                                                                                                                       |                                                             |
| HASHTAG          | Hashtag              | Refers to the use of Hashtag                                                                                                                                                                                                                                                                          |                                                             |
| HAVEMV           | Have Main Verb       | Refers to when any form of HAVE is the main verb                                                                                                                                                                                                                                                      | She <i>has</i> so much money, I <i>had</i> seven chocolates |
| IMPERATIVE       | Imperative           | Refers to clauses in imperative mood                                                                                                                                                                                                                                                                  | Go away!, Don't be foolish!                                 |
|                  | Indefinite Article   |                                                                                                                                                                                                                                                                                                       |                                                             |
| INDEFART         | Article              | Refers to use of indefinite article                                                                                                                                                                                                                                                                   | a, an                                                       |
| INFINITIVE       | Infinitive           | Refers to verbs in infinitive form that is not adjective + to complement clause or split infinitive                                                                                                                                                                                                   | to be, to have                                              |
| INITIALMENTION   | Initial Mention      | Refers to Tweet initial mentioning                                                                                                                                                                                                                                                                    | \@username how are you?                                     |
|                  | Modal of Necessity   |                                                                                                                                                                                                                                                                                                       |                                                             |
| MDNEC            | Modal of Necessity   | Refers to modals indicating necessity/obligation                                                                                                                                                                                                                                                      | should, mustn't, ought                                      |
|                  | Modal of Possibility |                                                                                                                                                                                                                                                                                                       |                                                             |
| MDPOSS           | Modal of Possibility | Refers to modals indicating probability/possibility/ability                                                                                                                                                                                                                                           | can, may, mightn't                                          |
| MDPRED+GOINGTOBE | Modal of Prediction  | Refers to modals indicating prediction and the BE-going-to construction                                                                                                                                                                                                                               | will, shall, I'll, I'm going to                             |
| NOMIN            | Nominalisation       | Refers to when verbs/adjectives are converted into nouns                                                                                                                                                                                                                                              | action, statement                                           |
|                  | Non-initial          |                                                                                                                                                                                                                                                                                                       |                                                             |
| MENTION          | Ment.                | Refers to mentioning that is not initial                                                                                                                                                                                                                                                              | I know that \@username likes cheese                         |
|                  | Numeral              |                                                                                                                                                                                                                                                                                                       |                                                             |
| NUMDET           | Determiner           | Refers to use of numerals functioning as determiners                                                                                                                                                                                                                                                  | Three dogs                                                  |
| NUMNOUN          | Numeral Noun         | Refers to use of numerals functioning as nouns                                                                                                                                                                                                                                                        | I have three.                                               |
| OBJPRO           | Object Pronoun       | Refers to use of pronouns in their objective form                                                                                                                                                                                                                                                     | me, us, them, him                                           |
|                  | Passive-Agentless    |                                                                                                                                                                                                                                                                                                       |                                                             |
| PASSIVE          | Agentless            | Refers to use of passive voice without the inclusion of an agent                                                                                                                                                                                                                                      | He was arrested. She was told not to speak.                 |

|             |                        |                                                                                               |                                                                                                                 |
|-------------|------------------------|-----------------------------------------------------------------------------------------------|-----------------------------------------------------------------------------------------------------------------|
| PAST        | Past Tense Verbs       | Refers to verbs in their past tense form that are not in perfect aspect                       | went, saved, held                                                                                               |
| PERCEPTVB   | Perception Verbs       | Refers to verbs of perception                                                                 | hear, smell, taste<br>She <i>had been</i> to the shops already.                                                 |
| PERFECT     | Perfect Aspect         | Refers to any form of HAVE + verb in past participle form                                     | .                                                                                                               |
| FULSTOP     | Period                 | Refers to the use of full stop                                                                | catch up, check up                                                                                              |
| MULTIWVB    | Phrasal verb           | Refers to both prepositional and particle verbs                                               | our cat, your house, their garden, his eyebrows                                                                 |
| POSSDET     | Possessive Determiner  | Refers to determiners which indicate possession                                               |                                                                                                                 |
| POSESPRPN   | Possessive Proper noun | Refers to proper nouns in possessive form                                                     | <i>Donald Trump's</i> hair                                                                                      |
| PREDADJ     | Predicative Adjective  | Refers to adjectives which come after a copular verb                                          | I am <i>great</i> ! She looks <i>crazy</i> , Gyms smell <i>nasty</i> .                                          |
| PREP        | Preposition            | Refers to the use of prepositions                                                             | <i>down</i> the road, <i>in</i> your car                                                                        |
| PRVV        | Private Verb           | Refers to private verbs: used to encode feelings, opinions, emotions, cognition               | believe, think, know, learn<br>I hate what he has <i>done</i> , She <i>did</i> it!                              |
| PROVDO      | Pro-verb Do            | Refers to DO used as a main verb                                                              |                                                                                                                 |
| PROGRESSIVE | Progressive Aspect     | Refers to any form of BE plus (up to 2/3 adverbs and) verb ending in -ING                     |                                                                                                                 |
| IT          | Pronoun IT             | Refers to any form of pronoun IT: contracted, reflexive, possessive and possessive determiner | It is great, it's okay, itself, its                                                                             |
| PRPN        | Proper Noun            | Refers to anything tagged as a proper noun                                                    |                                                                                                                 |
| PUBV        | Public Verb            | Refers to public verbs: used to report on speech                                              | told, said, shouted                                                                                             |
| DETQUAN     | Quantifier-Determiner  | Refers to the use of this, that, these, those as a determiner; that is followed by noun       | anything, somebody, I had a <i>few</i> , she had <i>several</i> , <i>some</i> of the men, <i>all</i> of the men |
| PROQUAN     | Quantifier-Pronoun     | Refers to pronouns which indicate quantity or are indefinite pronouns                         |                                                                                                                 |
| QUES        | Question Mark          | Refers to the use of question mark                                                            | ?, !?, !?!                                                                                                      |

|                 |                                  |                                                                                                                                                               |                                                                                 |
|-----------------|----------------------------------|---------------------------------------------------------------------------------------------------------------------------------------------------------------|---------------------------------------------------------------------------------|
| RELCLAUSESUBGAP | Relative-<br>Clause-<br>Subj.Gap | Refers to relative clauses with subject gap                                                                                                                   | The man that was cursed                                                         |
| SNDPP           | Second-Person-<br>Pronoun        | Refers to pronouns: subject/object/possessive/reflexive and possessive determiners that refer to the second person: singular and plural plus contracted forms | you, yours, you're, your<br>want, seem, appear, like, love,<br>prefer, need ... |
| STANCEVB        | Stance Verb                      | Refers to verbs used to encode stance                                                                                                                         | I, she, he, they, we                                                            |
| SUBJPRO         | Subject Pronoun                  | Refers to pronouns in their subject form                                                                                                                      | the best, the worst, she is<br>funniest                                         |
| SUPERLATIVE     | Superlative                      | Refers to adjectives and nouns in superlative form                                                                                                            | he, she, theirs, themselves,<br>them, hers                                      |
| THRDPP          | Third Person<br>Pronoun          | Refers to pronouns: subject/object/possessive/reflexive and possessive determiners that refer to the third person: singular and plural plus contracted forms  | thinks, has, takes                                                              |
| SINFLECT        | Third-Person-<br>Singular-Verb   | Refers to verbs ending in -s                                                                                                                                  | I'll be back <i>soon</i>                                                        |
| TIMEADV         | Time Adverb                      | Refers to adverbs indicating time                                                                                                                             |                                                                                 |
| URL             | URL                              | Refers to URLs: can be meme, gif, status, link to website, video etc.                                                                                         |                                                                                 |
| WHW             | WH-Word                          | Refers to use of WH words                                                                                                                                     | when, why, who, what, how                                                       |
