# Supplementary material for: Stylistic variation on the Donald Trump Twitter account: A linguistic analysis of tweets posted between 2009 and 2018
Source: PLOS journal article supplement (doi:10.1371/journal.pone.0222062), 2019-09-25
Supplement: S2 (10.1371/journal.pone.0222062.s002) [file journal.pone.0222062.s002]

| Feature_Set           | Tag         | Feature                | Description                                                                                                                    | Example                                                     |
|-----------------------|-------------|------------------------|--------------------------------------------------------------------------------------------------------------------------------|-------------------------------------------------------------|
| Acronym               | ACRONYM     | Acronym                | Refers to any initials separated by full stops                                                                                 | U.S.A, U.S, N.Y.                                            |
| Quantifier-Adverb     | ADVQUAN     | Quantifier as adverb   | Refers to quantifiers which are functioning as adverbs                                                                         | You all are my inspiration, We are all happy to see you     |
| Amplifier             | AMPLIFIER   | Amplifier              | Refers to adverbs used to intensify the verb/adjective                                                                         | very, absolutely, so                                        |
| Analytic-Neg          | ANALNEG     | Analytic negation      | Refers to 'not' plus contracted forms                                                                                          | can't, cannot, not                                          |
| Attributive-Adjective | ATTRIBADJ   | Attributive Adjective  | Adjectives that come before the noun and any other adjective not tagged as predicative                                         | The <i>big</i> cat                                          |
| Auxiliary-Do          | AUXDO       | Auxiliary do           | Refers to any form of DO that is followed by (up to three adverbs and) a verb                                                  | I <i>do</i> not like cheese, I <i>did</i> take the bins out |
| BE-initial-verb       | BEIVB       | BE as initial verb     | Refers to when BE is the first verb in the Tweet (after initial mentioning) or if BE is the first verb after a full stop       |                                                             |
|                       |             |                        | Refers to when BE is the main verb and when BE is in its copular form; that is, when it is followed by a predicative adjective | She <i>is</i> a beautiful woman; She <i>is</i> beautiful    |
| Copula BE             | BEMV        | BE as a main verb      |                                                                                                                                |                                                             |
| Bracket               | BRACKET     | Brackets               | Refers to the use of brackets                                                                                                  |                                                             |
| Capital               | CAPS        | Capitalisation         | Refers to two or more capital letters that is not tagged as an acronym/URL/mentioned username                                  |                                                             |
| Cause                 |             |                        |                                                                                                                                |                                                             |
| Subordinator          | CAUSESUB    | Cause subordinators    | Refers to subordinators which indicate a causal relationship                                                                   | because                                                     |
| Coordinating conj.    | CCONJ       | Coordinating conjuncts | Refers to coordinating conjunctions                                                                                            | and, &                                                      |
| Contrastive Conj.     | CNTRSTCONJ  | Contrastive conjuncts  | Refers to conjunctions that signal a contrast is being made                                                                    | but, by contrast                                            |
| Colon                 | COLON       | Colon                  | Refers to the use of colons                                                                                                    | :                                                           |
| Comma                 | COMMA       | Comma                  | Refers to the use of commas                                                                                                    | ,                                                           |
| Comparative           | COMPARATIVE | Comparatives           | Refers to adjectives in their comparative                                                                                      | She is <i>better</i> today, Drake >                         |

|                          |            |                           |                                                                                                                                      |                                                                               |
|--------------------------|------------|---------------------------|--------------------------------------------------------------------------------------------------------------------------------------|-------------------------------------------------------------------------------|
|                          |            |                           | form                                                                                                                                 | RiRi, I went for something <i>more</i> substantial                            |
| Concessive Subordinator  | CONCESUB   | Concessive subordinators  | Refers to subordinators which indicate concession                                                                                    | although, though                                                              |
| Conditional Subordinator | CONDISUB   | Conditional subordinators | Refers to subordinators indicating a condition                                                                                       | if, unless                                                                    |
| WH-contracted verb       | CONTRACTWH | WH words contracted       | Refers to WH that have the verb contracted                                                                                           | <i>what's, who'd, where's</i>                                                 |
| Other Copula             | COPVB      | Copula verbs              | Refers to copula verbs but not BE as a main verb (even if it is in its copula form, that is: when it is followed by predicative      |                                                                               |
| Definite Article         | DEFART     | Definite article          | Refers to the use of the definite article                                                                                            |                                                                               |
| Demonstrative Determiner | DEMDET     | Demonstrative determiner  | Refers to the use of this, that, these, those as a determiner; that is followed by noun                                              |                                                                               |
| Demonstrative Pronoun    | DEMPRO     | Demonstrative pronoun     | Refers to the use of this, that, these, those as a pronoun; that is NOT followed by noun                                             |                                                                               |
| Quantifier-Determiner    | DETQUAN    | Quantifier as determiner  | Refers to quantifiers used as a determiner                                                                                           | <i>Few</i> people, <i>some</i> people                                         |
|                          |            |                           | Refers to when any form of DO is the first verb in the Tweet (after initial mentioning) or if DO is the first verb after a full stop | Doesn't the world look different                                              |
| DO-initial-verb          | DOIVB      | DO as initial verb        | Refers to adverbs used to reduce the force of the adjective/verb                                                                     | He is <i>slightly</i> fat, It was <i>pretty</i> awful                         |
| Downtoner                | DOWNTONER  | Downtoner                 | Refers to three or more fullstops                                                                                                    | ...                                                                           |
| Elipsis                  | ELIPS      | Ellipsis                  | Refers to anything tagged by the Gimpel tagger as an emoticons                                                                       | :)                                                                            |
| Emoji/Emoticon           | EMOTICON   | Emoticons or emojis       |                                                                                                                                      |                                                                               |
| Exclamation Mark         | EXCLAM     | Exclamation marks         | Refers to the use of exclamation marks                                                                                               | !!!, !?                                                                       |
|                          |            |                           | Refers to the use of <i>there</i> in its existential form and thus not as a place adverb                                             | <i>There</i> was a man in dark clothing, <i>There</i> may be 5 or 6 obstacles |
| Existential there        | EXIST      | Existential <i>there</i>  | Refers to pronouns:                                                                                                                  | I, We, us, me, myself,                                                        |
| First Pers. Pron.        | FSTPP      | First person pronoun      |                                                                                                                                      |                                                                               |

|                          |            |                        |                                                                                                                                                                           |                                                                                                                              |
|--------------------------|------------|------------------------|---------------------------------------------------------------------------------------------------------------------------------------------------------------------------|------------------------------------------------------------------------------------------------------------------------------|
|                          |            |                        | subject/object/possessive/reflexive and possessive determiners that refer to the first person: singular and plural plus contracted forms                                  | ourselves, ours, our, my, mine                                                                                               |
| Period                   | FULSTOP    | Full stop              | Refers to the use of full stop<br>Refers to prepositional complement: when a preposition is followed by noun in -ing form (but this is tagged by Gimpel tagger as a verb) | .                                                                                                                            |
| Gerund                   | GERUND     | Gerund                 |                                                                                                                                                                           | Sarah talked about <i>leaving</i> her job<br><i>I'm going to be</i> in Kansas tonight, She <i>is going to</i> leave her job. |
| BE going to construction | GOINTOBE   | The form 'BE going to' | Refers to any form of BE (including contracted) + going + to                                                                                                              |                                                                                                                              |
| Hashtag                  | HASHTAG    | Hashtag                | Refers to the use of Hashtag                                                                                                                                              |                                                                                                                              |
| HAVE-initial-verb        | HAVEIVB    | HAVE as initial verb   | Refers to when any form of HAVE is the first verb in the Tweet (after initial mentioning) or if HAVE is the first verb after a full stop                                  |                                                                                                                              |
| Have Main Verb           | HAVEMV     | HAVE as main verb      | Refers to when any form of HAVE is the main verb                                                                                                                          | She <i>has</i> so much money, I <i>had</i> seven chocolates                                                                  |
| Indefinite Article       | INDEFART   | Indefinite article     | Refers to use of indefinite article                                                                                                                                       | a, an                                                                                                                        |
| Imperative               | IMPERATIVE | Imperative clause      | Refers to clauses in imperative mood<br>Refers to verbs in infinitive form that is not adjective + to complement clause or split infinitive                               | Go away!, Don't be foolish!                                                                                                  |
| Infinitive               | INFINITIVE | Infinitive             | Refers to verb in ING form that is not in standard progressive form (likely a gerund/nominalisation)                                                                      | to be, to have<br>Going for walks is my favourite thing to do on a Saturday                                                  |
| Verb-ING                 | ING        | Verb in ING form       | Refers to any form of pronoun IT: contracted, reflexive, possessive and possessive determiner                                                                             |                                                                                                                              |
| Pronoun IT               | IT         | Pronoun IT             | Refers to initial verbs in their base form which are followed by particular things making them unlikely to be imperative                                                  | It is great, it's okay, itself, its<br>wish you were here, love to go, want to spend, do you                                 |
| Initial verb             | IVB        | Initial verb           |                                                                                                                                                                           |                                                                                                                              |

|                       |          |                        |                                                                                                                         |                         |
|-----------------------|----------|------------------------|-------------------------------------------------------------------------------------------------------------------------|-------------------------|
|                       |          |                        | clauses                                                                                                                 |                         |
| Laughter              | LAUGH    | Laughter               | Refers to written out laughter                                                                                          | haha, lol, lmao, lmfaol |
| Modal of Necessity    | MDNEC    | Modal of necessity     | Refers to modals indicating necessity/obligation                                                                        | should, mustn't, ought  |
| Modal of Possibility  | MDPOSS   | Modal of possibility   | Refers to modals indicating probability/possibility/ability                                                             | can, may, mightn't      |
| Modal of Prediction   | MDPRED   | Modal of Prediction    | Refers to modals indicating prediction                                                                                  | will, shall, I'll       |
| Non-initial Ment.     | MENTION  | Non-initial mentioning | Refers to mentioning that is not initial                                                                                | \@username              |
| Phrasal verb          | MULTIWVB | Multiword verb         | Refers to both prepositional and particle verbs                                                                         |                         |
| Negative interjection | NEGINTJ  | Negative interjections | Refers to forms of NO that are tagged as interjections by Gimpel tagger                                                 | No_!, Naaaa_!           |
| Nominalisation        | NOMIN    | Nominalisation         | Refers to when verbs/adjectives are converted into nouns                                                                | action, statement       |
| Numeral Determiner    | NUMDET   | Numeral as determiner  | Refers to use of numerals functioning as determiners                                                                    | Three dogs              |
| Numeral Noun          | NUMNOUN  | Numeral as noun        | Refers to use of numerals functioning as nouns                                                                          | I have three.           |
| Object Pronoun        | OBJPRO   | Object pronoun         | Refers to use of pronouns in their objective form                                                                       | me, us, them, him       |
| Ordinal Determiner    | ORDDET   | Ordinal as determiner  | Refers to use of ordinals functioning as determiners                                                                    | She took second place.  |
| Ordinal Noun          | ORDNOUN  | Ordinal as noun        | Refers to use of ordinals functioning as nouns                                                                          | I came first!           |
| General Adverb        | OTHERADV | Other adverb           | Refers to other adverbs that are not tagged as amplifiers, downtoners, time and place adverbials, etc.                  |                         |
| General Conjunction   | OTHRCONJ | Other conjunction      | Refers to other conjunctions not tagged as either contrastive or coordinating                                           |                         |
| General Interjections | OTHRINTJ | Other interjection     | Refers to other interjections that are not tagged as laughter, positive interjection 'Yes', negative interjections 'No' | OMG, WOW!               |

|                        |            |                         |                                                                                                                                                                                                                                                                                                       |                                                                                                                            |
|------------------------|------------|-------------------------|-------------------------------------------------------------------------------------------------------------------------------------------------------------------------------------------------------------------------------------------------------------------------------------------------------|----------------------------------------------------------------------------------------------------------------------------|
| General Noun           | OTHRNOUN   | Other noun              | Refers to other nouns that are not tagged as numeral, quantifiers, nominalisations, ordinals                                                                                                                                                                                                          |                                                                                                                            |
| General Subordinator   | OTHRSUB    | Other subordinator      | Refers to other subordinators that are not tagged as time, place, cause, concessive, and conditional subordinators                                                                                                                                                                                    |                                                                                                                            |
| General Verb           | OTHRVERB   | Other verb              | Refers to other verbs that are not tagged as private verbs, public verbs, verb-ing, past tense verbs, participle verbs, third person singular, suasive verbs, perception verbs, copular verbs, be as main verb, auxiliary be, auxiliary have, be as main verb, pro-verb do, auxiliary do, stance verb |                                                                                                                            |
| Agentless-Passive      | PASSIVE    | Agentless Passive       | Refers to use of passive voice without the inclusion of an agent                                                                                                                                                                                                                                      | He was arrested. She was told not to speak.<br>He was arrested by the police.<br>She was told not to speak by her teacher. |
| By-Passive             | PASSVEBY   | By passive              | Refers to use of passive voice with agent in by clause                                                                                                                                                                                                                                                |                                                                                                                            |
| Past Tense Verbs       | PAST       | Past tense verbs        | Refers to verbs in their past tense form that are not in perfect aspect                                                                                                                                                                                                                               | went, saved, held                                                                                                          |
| Perception Verbs       | PERCEPTVB  | Perception verbs        | Refers to verbs of perception                                                                                                                                                                                                                                                                         | hear, smell, taste                                                                                                         |
| Perfect Aspect         | PERFECT    | Perfect aspect          | Refers to any form of HAVE + verb in past participle form                                                                                                                                                                                                                                             | She <i>had been</i> to the shops already.<br>with/to whom did Sarah speak?, the box in which it was kept.                  |
| Pied-piping relative   | PIEDPIPREL | Pied piping relatives   | Refers to the use of preposition + relative pronoun to avoid stranded preposition                                                                                                                                                                                                                     |                                                                                                                            |
| Place Adverbs          | PLACEADV   | Place adverbials        | Refers to adverbs indicating place                                                                                                                                                                                                                                                                    | behind, beneath, downhill<br>I will find you <i>wherever</i> you go, you can find me <i>where</i> the food table is.       |
| Place Subordinator     | PLACESUB   | Place subordinators     | Refers to subordinators indicating place                                                                                                                                                                                                                                                              |                                                                                                                            |
| Possessive noun        | POSESNOUN  | Possessive nouns        | Refers to nouns in possessive form                                                                                                                                                                                                                                                                    | The cat's dinner                                                                                                           |
| Possessive Proper noun | POSESPRPN  | Possessive proper nouns | Refers to proper nouns in possessive form                                                                                                                                                                                                                                                             | <i>Donald Trump's</i> hair                                                                                                 |
| Positive Interjection  | POSINTJ    | Positive interjections  | Refers to any form of YES tagged as an interjection by the Gimpel tagger                                                                                                                                                                                                                              | Yeahhhh_!, Yup_!, Ya_!                                                                                                     |
| Possessive             | POSSDET    | Possessive determiners  | Refers to determiners which indicate                                                                                                                                                                                                                                                                  | our cat, your house, their                                                                                                 |

|                                |                 |                                                                |                                                                                 |                                                                                                                 |
|--------------------------------|-----------------|----------------------------------------------------------------|---------------------------------------------------------------------------------|-----------------------------------------------------------------------------------------------------------------|
| Determiner                     |                 |                                                                | possession                                                                      | garden, his eyebrows                                                                                            |
| Possessive Pronoun             | POSSPRO         | Possessive pronouns                                            | Refers to pronouns which indicate possession                                    | It is ours/mine/yours/theirs/his/hers.                                                                          |
| Predicative Adjective          | PREDADJ         | Predicative adjectives                                         | Refers to adjectives which come after a copular verb                            | I am <i>great</i> ! She looks <i>crazy</i> , Gyms smell <i>nasty</i> .                                          |
| Pre Determiner                 | PREDET          | Pre-determiners                                                | Refers to determiners which come before determiners                             | <i>All</i> the people in this room are intelligent.                                                             |
| Preposition                    | PREP            | Prepositions                                                   | Refers to the use of prepositions                                               | <i>down</i> the road, <i>in</i> your car                                                                        |
| Auxiliary Contraction          | PROCONTRACT     | Pronoun with contracted verb                                   | Refers to when the verb is contracted with pronoun                              | I'm, She'd, They've, You'll, That's                                                                             |
| Progressive Aspect             | PROGRESSIVE     | Progressive aspect                                             | Refers to any form of BE plus (up to 2/3 adverbs and) verb ending in -ING       | anything, somebody, I had a <i>few</i> , she had <i>several</i> , <i>some</i> of the men, <i>all</i> of the men |
| Quantifier-Pronoun             | PROQUAN         | Quantifying pronoun (Indefinite pronouns)                      | Refers to pronouns which indicate quantity or are indefinite pronouns           |                                                                                                                 |
| Quantifier-Pronoun-Contraction | CONTRACTPROQUAN | Quantifying pronoun (Indefinite pronouns) with contracted verb | Refers to quantifying pronouns with the verb contracted                         | noone's happy today, everyone's been before                                                                     |
| Quantifier-Pronoun-Possessive  | POSESPROQUAN    | Possessive Quantifying pronoun (Indefinite pronouns)           | Refers to quantifying pronouns in their possessive form                         | somebody's jumper<br>I hate what he has <i>done</i> , She <i>did</i> it!                                        |
| Pro-verb Do                    | PROVDO          | Pro-verb DO                                                    | Refers to DO used as a main verb                                                |                                                                                                                 |
| Proper Noun                    | PRPN            | Proper noun                                                    | Refers to anything tagged as a proper noun                                      |                                                                                                                 |
| Private Verb                   | PRVV            | Private verb                                                   | Refers to private verbs: used to encode feelings, opinions, emotions, cognition | believe, think, know, learn                                                                                     |
| Public Verb                    | PUBV            | Public verb                                                    | Refers to public verbs: used to report on speech                                | told, said, shouted                                                                                             |
| Quantifier-Pre-determiner      | QUANPREDET      | Quantifier as pre-determiner                                   | Refers to quantifier as a predeterminer                                         | <i>All</i> the people in this room are intelligent.                                                             |
| WH-word+BE                     | QBE             | Question BE: BE following WH word                              | Refers to WH-word + BE                                                          | Why are you going?                                                                                              |

|                                    |                 |                                      |                                                                                                                                                               |                                                                |
|------------------------------------|-----------------|--------------------------------------|---------------------------------------------------------------------------------------------------------------------------------------------------------------|----------------------------------------------------------------|
| WH-word+DO                         | QDO             | Question DO: DO following WH word    | Refers to WH-word + DO                                                                                                                                        | When do you care?                                              |
| Question Mark                      | QUES            | Question mark                        | Refers to the use of question mark                                                                                                                            | ?, !?, !?!<br>myself, herself, ourselves, themselves, yourself |
| Reflexive Pronoun                  | REFLEXPRO       | Reflexive pronoun                    | Refers to pronouns in their reflexive form                                                                                                                    |                                                                |
| Relative-Clause-Obj.Gap            | RELCLAUSEN      | Relative clause object gap           | Refers to relative clause with object gap                                                                                                                     | The man that the gypsy cursed                                  |
| Relative-Clause-Subj.Gap           | RELCLAUSESUBGAP | Relative clause subject gap          | Refers to relative clauses with subject gap                                                                                                                   | The man that was cursed                                        |
| Profanity                          | SWEAR           | Various types of swear words         | Refers to words that can be used to offend/abuse as well as swear words generally. They may also be used harmlessly                                           |                                                                |
| Third-Person-Singular-Verb         | SINFLECT        | Third person singular verb ending -s | Refers to verbs ending in -s                                                                                                                                  | thinks, has, takes                                             |
| Semi-Colon                         | SMCOLON         | Semi colon                           | Refers to use of semicolon                                                                                                                                    |                                                                |
|                                    |                 |                                      | Refers to pronouns: subject/object/possessive/reflexive and possessive determiners that refer to the second person: singular and plural plus contracted forms | you, yours, you're, your                                       |
| Second-Person-Pronoun              | SNDPP           | Second person pronoun                | Refers to verb in infinitive form separated by adverb(s)                                                                                                      | to really hate, to not like                                    |
| Split-Infinitive                   | SPLINFINITIVE   | Split infinitive                     |                                                                                                                                                               | want, seem, appear, like, love, prefer, need ...               |
| Stance Verb                        | STANCEVB        | Stance verb                          | Refers to verbs used to encode stance                                                                                                                         | beg, insist, command, demand, allow...                         |
| Suasive Verb                       | SUAV            | Suasive verb                         | Refers to verbs which refer to persuasion                                                                                                                     |                                                                |
| Subordinating-Clause-Elipped-Subj. | SUBELIPSUBJECT  | Subordinator with elipted subject    | Refers to subordinators with the subject omitted                                                                                                              | the Bible quotes God as saying ...                             |
| Subject Pronoun                    | SUBJPRO         | Subject pronoun                      | Refers to pronouns in their subject form                                                                                                                      | I, she, he, they, we                                           |
| Superlative                        | SUPERLATIVE     | Superlative                          | Refers to adjectives and nouns in                                                                                                                             | the best, the worst, she is                                    |

|                                   |              |                                                             |                                                                                                                                                              |                                                                         |
|-----------------------------------|--------------|-------------------------------------------------------------|--------------------------------------------------------------------------------------------------------------------------------------------------------------|-------------------------------------------------------------------------|
| Synthetic-Negation                | SYNNEG       | Synthetic negation                                          | superlative form                                                                                                                                             | funniest                                                                |
| <i>that</i> -Adjective-Complement | THATADJCOMP  | Adjective+that complement clause                            | Refers to use of nor, neither and no - but not as interjection                                                                                               | No, neither, nor, no more                                               |
| <i>that</i> -Noun-Complement      | THATNOUNCOMP | Noun+ that complement clause                                | Refers to adjective that complement clauses                                                                                                                  | It's pathetic that you can't sleep without a night light at 40.         |
| <i>that</i> -Verb-Complement      | THATVCOMP    | Verb+that complement clause                                 | Refers to noun complement clauses                                                                                                                            | the fact that you can't sleep without a night light makes you pathetic. |
| Third Person Pronoun              | THRDPP       | Third person pronoun                                        | Refers to PRVV, PUBVB, SUAV + that                                                                                                                           | I think that you are pathetic for sleeping with a night light.          |
| Time Adverb                       | TIMEADV      | Time adverb                                                 | Refers to pronouns: subject/object/possessive/reflexive and possessive determiners that refer to the third person: singular and plural plus contracted forms | he, she, theirs, themselves, them, hers                                 |
| Subordinator                      | TIMESUB      | Time subordinator                                           | Refers to adverbs indicating time                                                                                                                            | I'll be back <i>soon</i>                                                |
| Title                             | TITLE        | Title                                                       | Refers to subordinators indicating time                                                                                                                      | <i>While</i> his mother slept, he snuck out the window.                 |
| <i>to</i> -Adjective-Complement   | TOADJCOMP    | Adjective+to complement clause                              | Refers to titles                                                                                                                                             | Mr. Dr, Miss, Sir                                                       |
| URL                               | URL          | URL                                                         | Refers to adjective + to complement clause                                                                                                                   | I am happy to go with Karen.                                            |
| Frequency-Adverbs                 | USUALITY     | Adverbs of usuality/frequency                               | Refers to URLs: can be meme, gif, status, link to website, video etc.                                                                                        |                                                                         |
| Initial Verb-ING                  | VBIG         | Initial verb ing -ing form (probably gerund/nominalisation) | Refers to adverbs indicating how often                                                                                                                       | always, never, often                                                    |
| Initial Verb-Modal                | VBIMD        | Initial verb that is a modal verb (probably a request)      | Refers to when verb ending in -ing is the first verb in the Tweet (after initial mentioning) or if it is the first verb after a full stop                    |                                                                         |
| Initial Verb-Ques                 | VBIQ         | Initial verb that is most likely to be a question           | Refers to when modal verb is the first verb in the Tweet (after initial mentioning) or if a modal verb is the first verb after a full stop                   |                                                                         |



|                   |                |                                 |                                                                                                                                                                                                           |                                                                            |
|-------------------|----------------|---------------------------------|-----------------------------------------------------------------------------------------------------------------------------------------------------------------------------------------------------------|----------------------------------------------------------------------------|
| Initial Verb-S    | VBIS           | Initial verb ending in -s       | Refers to when verb ending in -s is the first verb in the Tweet (after initial mentioning) or if it is the first verb after a full stop (except for a select few verbs which can be used for imperatives) |                                                                            |
| Initial Verb-Past | VBIX           | Initial verb in past tense form | Refers to when verb in past tense/past participle form is the first verb in the Tweet (after initial mentioning) or if it is the first verb after a full stop                                             |                                                                            |
| WH-Word           | WHW            | WH word                         | Refers to use of WH words                                                                                                                                                                                 | when, why, who, what, how<br>Do you understand <i>what</i> cooperation is? |
| WH-clause         | WHCLAUSE       | WH clause                       | Refers to WH clauses                                                                                                                                                                                      |                                                                            |
| Initial-Mention   | INITIALMENTION | Initial Mention                 | Refers to Tweet initial mentioning                                                                                                                                                                        | \@username how are you?                                                    |
